# Supplementary material
Source: PubMed Central journal article supplement (PMC7318004)
Supplement: AAC.00092-20-s0001.pdf [file AAC.00092-20-s0001.pdf]

**Table S1 Distribution of serovars and serogroups among *Salmonella* spp. isolates recovered from patients with diarrhea, food of animal origin, and pets in China.**

| Serogroup   | Serovars         | Patients with Diarrhea |      |     |       | Food of animal origin |              |      | Pets  |        |        | Total |       |
|-------------|------------------|------------------------|------|-----|-------|-----------------------|--------------|------|-------|--------|--------|-------|-------|
|             |                  | ≤5                     | 5-59 | ≥60 | Total | Aquatic product       | Chicken meat | Pork | Total | Turtle | pigeon |       | Total |
| Group A     | Paratyphi A      | 0                      | 0    | 1   | 1     | 0                     | 0            | 0    | 0     | 0      | 0      | 0     | 1     |
|             | Total            | 0                      | 0    | 1   | 1     | 0                     | 0            | 0    | 0     | 0      | 0      | 0     | 1     |
| Group B     | Typhimurium      | 333                    | 195  | 65  | 593   | 3                     | 29           | 29   | 61    | 5      | 5      | 10    | 664   |
|             | Derby            | 34                     | 31   | 10  | 75    | 1                     | 9            | 44   | 54    | 0      | 0      | 0     | 129   |
|             | Stanley          | 20                     | 10   | 3   | 33    | 3                     | 0            | 0    | 3     | 0      | 0      | 0     | 36    |
|             | Agona            | 15                     | 8    | 0   | 23    | 4                     | 43           | 3    | 50    | 0      | 2      | 2     | 75    |
|             | Saintpaul        | 12                     | 3    | 3   | 18    | 0                     | 0            | 0    | 0     | 0      | 0      | 0     | 18    |
|             | Paratyphi B      | 7                      | 4    | 1   | 12    | 3                     | 1            | 0    | 4     | 0      | 0      | 0     | 16    |
|             | Indiana          | 0                      | 1    | 0   | 1     | 0                     | 93           | 1    | 94    | 0      | 0      | 0     | 95    |
|             | Schleissheim     | 0                      | 0    | 0   | 0     | 0                     | 8            | 0    | 8     | 0      | 0      | 0     | 8     |
|             | Reading          | 0                      | 0    | 1   | 1     | 0                     | 0            | 0    | 0     | 0      | 0      | 0     | 1     |
|             | Brandenburg      | 0                      | 1    | 0   | 1     | 0                     | 0            | 0    | 0     | 0      | 0      | 0     | 1     |
|             | Schwarzengrund   | 0                      | 0    | 0   | 0     | 0                     | 0            | 1    | 1     | 0      | 0      | 0     | 1     |
|             | Total            | 421                    | 253  | 83  | 757   | 14                    | 183          | 78   | 275   | 5      | 7      | 12    | 1044  |
|             | Group C1         | Infantis               | 15   | 19  | 11    | 45                    | 0            | 7    | 3     | 10     | 0      | 0     | 0     |
| Rissen      |                  | 18                     | 11   | 6   | 35    | 1                     | 3            | 7    | 11    | 0      | 0      | 0     | 46    |
| Thompson    |                  | 14                     | 14   | 5   | 33    | 15                    | 0            | 3    | 18    | 19     | 0      | 19    | 70    |
| Mbandaka    |                  | 2                      | 7    | 0   | 9     | 0                     | 1            | 0    | 1     | 0      | 0      | 0     | 10    |
| Virchow     |                  | 1                      | 6    | 0   | 7     | 0                     | 0            | 0    | 0     | 4      | 0      | 4     | 11    |
| Braenderup  |                  | 0                      | 6    | 1   | 7     | 0                     | 0            | 0    | 0     | 0      | 0      | 0     | 7     |
| Bareilly    |                  | 5                      | 0    | 1   | 6     | 0                     | 0            | 0    | 0     | 0      | 0      | 0     | 6     |
| Tennessee   |                  | 0                      | 4    | 1   | 5     | 0                     | 0            | 0    | 0     | 0      | 0      | 0     | 5     |
| Montevideo  |                  | 0                      | 3    | 1   | 4     | 0                     | 0            | 0    | 0     | 0      | 0      | 0     | 4     |
| Singapore   |                  | 2                      | 0    | 1   | 3     | 0                     | 0            | 0    | 0     | 0      | 0      | 0     | 3     |
| Livingston  |                  | 0                      | 2    | 0   | 2     | 1                     | 0            | 0    | 1     | 4      | 0      | 4     | 7     |
| Oranieburg  |                  | 0                      | 1    | 0   | 1     | 0                     | 0            | 0    | 0     | 0      | 0      | 0     | 1     |
| Isangi      |                  | 0                      | 0    | 0   | 0     | 0                     | 0            | 2    | 2     | 0      | 0      | 0     | 2     |
| Total       |                  | 57                     | 73   | 27  | 157   | 17                    | 11           | 15   | 43    | 27     | 0      | 27    | 227   |
| Group C2-C3 |                  | Litchfield             | 1    | 12  | 6     | 19                    | 1            | 0    | 0     | 1      | 0      | 0     | 0     |
|             | Gold-coast       | 4                      | 8    | 3   | 15    | 0                     | 0            | 0    | 0     | 0      | 0      | 0     | 15    |
|             | Bovismorbificans | 5                      | 3    | 1   | 9     | 0                     | 0            | 1    | 1     | 0      | 0      | 0     | 10    |
|             | Newport          | 1                      | 7    | 0   | 8     | 0                     | 0            | 0    | 0     | 0      | 0      | 0     | 8     |
|             | Corvallis        | 2                      | 4    | 0   | 6     | 0                     | 16           | 0    | 16    | 0      | 2      | 2     | 24    |
|             | Hadar            | 3                      | 1    | 0   | 4     | 0                     | 0            | 0    | 0     | 0      | 0      | 0     | 4     |
|             | Chailey          | 0                      | 3    | 1   | 4     | 0                     | 0            | 0    | 0     | 0      | 0      | 0     | 4     |
|             | Sandiego         | 0                      | 2    | 0   | 2     | 0                     | 0            | 0    | 0     | 0      | 0      | 0     | 2     |
|             | Albany           | 0                      | 0    | 1   | 1     | 0                     | 9            | 0    | 9     | 0      | 0      | 0     | 10    |
|             | Altona           | 0                      | 1    | 0   | 1     | 0                     | 1            | 0    | 1     | 0      | 0      | 0     | 2     |
|             | Muenchen         | 1                      | 0    | 0   | 1     | 1                     | 4            | 0    | 5     | 0      | 0      | 0     | 6     |
|             | Manhattan        | 1                      | 0    | 0   | 1     | 0                     | 0            | 0    | 0     | 0      | 0      | 0     | 1     |
|             | Brunei           | 1                      | 0    | 0   | 1     | 0                     | 0            | 0    | 0     | 0      | 0      | 0     | 1     |
|             | Kottbus          | 1                      | 0    | 1   | 1     | 0                     | 0            | 0    | 0     | 0      | 0      | 0     | 1     |
|             | Kentucky         | 0                      | 1    | 0   | 1     | 0                     | 0            | 0    | 0     | 0      | 0      | 0     | 1     |
| Total       | 20               | 42                     | 13   | 74  | 2     | 30                    | 1            | 33   | 0     | 2      | 2      | 109   |       |
| Group D1    | Enteritis        | 170                    | 183  | 63  | 416   | 1                     | 252          | 2    | 255   | 1      | 0      | 1     | 672   |

|          |              |     |     |     |      |    |     |     |     |    |   |    |      |
|----------|--------------|-----|-----|-----|------|----|-----|-----|-----|----|---|----|------|
|          | Javiana      | 9   | 0   | 1   | 10   | 0  | 0   | 0   | 0   | 0  | 0 | 0  | 10   |
|          | Panama       | 1   | 0   | 0   | 1    | 0  | 0   | 0   | 0   | 0  | 0 | 0  | 1    |
|          | Houston      | 0   | 0   | 1   | 1    | 0  | 0   | 0   | 0   | 0  | 0 | 0  | 1    |
|          | Total        | 180 | 183 | 65  | 428  | 1  | 252 | 2   | 255 | 1  | 0 | 1  | 684  |
| Group E1 | London       | 26  | 42  | 9   | 77   | 0  | 0   | 20  | 20  | 0  | 0 | 0  | 97   |
|          | Give         | 2   | 18  | 4   | 24   | 0  | 0   | 2   | 2   | 0  | 0 | 0  | 26   |
|          | Meleagridis  | 0   | 7   | 2   | 9    | 0  | 0   | 2   | 2   | 0  | 0 | 0  | 11   |
|          | Uganda       | 0   | 2   | 2   | 4    | 0  | 0   | 0   | 0   | 0  | 0 | 0  | 4    |
|          | Muenster     | 0   | 4   | 0   | 4    | 0  | 4   | 0   | 4   | 0  | 0 | 0  | 8    |
|          | Lexington    | 0   | 1   | 1   | 2    | 0  | 0   | 0   | 0   | 0  | 0 | 0  | 2    |
|          | Weltevreden  | 1   | 0   | 0   | 1    | 1  | 0   | 0   | 1   | 0  | 0 | 0  | 2    |
|          | Anatum       | 0   | 0   | 0   | 0    | 0  | 2   | 1   | 3   | 0  | 0 | 0  | 3    |
|          | Orion        | 0   | 0   | 0   | 0    | 1  | 0   | 0   | 1   | 1  | 0 | 1  | 2    |
|          | Total        | 29  | 74  | 18  | 121  | 2  | 6   | 25  | 33  | 1  | 0 | 1  | 155  |
| Group E4 | Senftenberg  | 1   | 17  | 2   | 20   | 0  | 1   | 0   | 1   | 0  | 0 | 0  | 21   |
|          | Liverpool    | 0   | 0   | 0   | 0    | 0  | 1   | 0   | 1   | 0  | 0 | 0  | 1    |
|          | Total        | 1   | 17  | 2   | 20   | 0  | 2   | 0   | 2   | 0  | 0 | 0  | 22   |
| Group F  | Aberdeen     | 2   | 3   | 0   | 5    | 9  | 0   | 0   | 9   | 0  | 0 | 0  | 14   |
|          | Total        | 2   | 3   | 0   | 5    | 9  | 0   | 0   | 9   | 0  | 0 | 0  | 14   |
| Group G  | Poona        | 1   | 1   | 0   | 2    | 0  | 0   | 0   | 0   | 0  | 0 | 0  | 2    |
|          | Worthington  | 1   | 0   | 0   | 1    | 0  | 0   | 0   | 0   | 1  | 0 | 1  | 2    |
|          | Havana       | 0   | 0   | 0   | 0    | 3  | 1   | 0   | 4   | 3  | 0 | 3  | 7    |
|          | Total        | 2   | 1   | 0   | 3    | 3  | 1   | 0   | 4   | 4  | 0 | 4  | 11   |
| Group H  | Carrau       | 0   | 0   | 0   | 1    | 0  | 0   | 0   | 0   | 0  | 0 | 0  | 1    |
|          | Total        | 0   | 0   | 0   | 1    | 0  | 0   | 0   | 0   | 0  | 0 | 0  | 1    |
| Group I  | Hvittingfoss | 0   | 0   | 0   | 0    | 0  | 0   | 0   | 0   | 3  | 0 | 3  | 3    |
|          | Total        | 0   | 0   | 0   | 0    | 0  | 0   | 0   | 0   | 3  | 0 | 3  | 3    |
| Group K  | Cerro        | 1   | 0   | 0   | 1    | 0  | 0   | 0   | 0   | 0  | 0 | 0  | 1    |
|          | Total        | 1   | 0   | 0   | 1    | 0  | 0   | 0   | 0   | 0  | 0 | 0  | 1    |
| Group M  | Amoutive     | 1   | 0   | 0   | 1    | 0  | 0   | 0   | 0   | 0  | 0 | 0  | 1    |
|          | Pomona       | 0   | 0   | 0   | 0    | 0  | 0   | 0   | 0   | 1  | 0 | 1  | 1    |
|          | Total        | 1   | 0   | 0   | 1    | 0  | 0   | 0   | 0   | 1  | 0 | 1  | 2    |
| Group Q  | Wandsworth   | 3   | 0   | 0   | 3    | 4  | 0   | 0   | 4   | 0  | 0 | 0  | 7    |
|          | Total        | 3   | 0   | 0   | 3    | 4  | 0   | 0   | 4   | 0  | 0 | 0  | 7    |
| Group R  | Johannesburg | 0   | 0   | 0   | 0    | 0  | 1   | 1   | 2   | 0  | 0 | 0  | 2    |
|          | Total        | 0   | 0   | 0   | 0    | 0  | 1   | 1   | 2   | 0  | 0 | 0  | 2    |
| Overall  |              | 717 | 646 | 209 | 1572 | 52 | 486 | 122 | 660 | 42 | 9 | 51 | 2283 |

Patient age distribution is indicated ( $\leq 5$ , 5-59, and  $\geq 60$  years old).



|                                         |        |        |        |         |        |         |        |         |        |         |
|-----------------------------------------|--------|--------|--------|---------|--------|---------|--------|---------|--------|---------|
| AMP-SAM-TET-SXT                         | 5(0.7) | 0(0.0) | 0(0.0) | 5(0.3)  | 2(3.8) | 6(1.2)  | 3(2.5) | 11(1.7) | 0(0.0) | 16(0.7) |
| GEN-CHL-CIP-NAL-AMP-SAM-TET-CAZ-CTX-SXT | 2(0.3) | 0(0.0) | 0(0.0) | 2(0.1)  | 0(0.0) | 11(2.3) | 1(0.8) | 12(1.8) | 1(2.0) | 15(0.7) |
| CHL-AMP-TET                             | 8(1.1) | 1(0.2) | 4(1.9) | 13(0.8) | 0(0.0) | 0(0.0)  | 0(0.0) | 0(0.0)  | 1(2.0) | 14(0.6) |
| CHL-CIP-NAL-AMP-SAM-TET-SXT             | 1(0.1) | 0(0.0) | 0(0.0) | 1(0.1)  | 0(0.0) | 7(1.4)  | 3(2.5) | 10(1.5) | 3(5.9) | 14(0.6) |
| CHL-NAL-TET                             | 5(0.7) | 2(0.3) | 4(1.9) | 11(0.7) | 0(0.0) | 1(0.2)  | 1(0.8) | 2(0.3)  | 1(2.0) | 14(0.6) |
| NAL-TET-SXT                             | 1(0.1) | 1(0.2) | 1(0.5) | 3(0.2)  | 1(1.9) | 4(0.8)  | 6(4.9) | 11(1.7) | 0(0.0) | 14(0.6) |
| CHL-AMP-TET-SXT                         | 6(0.8) | 1(0.2) | 3(1.4) | 10(0.6) | 0(0.0) | 1(0.2)  | 1(0.8) | 2(0.3)  | 0(0.0) | 12(0.5) |
| CHL-CIP-AMP-SAM-TET-CAZ-CTX-SXT         | 1(0.1) | 0(0.0) | 0(0.0) | 1(0.1)  | 0(0.0) | 11(2.3) | 0(0.0) | 11(1.7) | 0(0.0) | 12(0.5) |
| CHL-CIP-NAL-AMP-TET                     | 6(0.8) | 0(0.0) | 6(2.9) | 12(0.8) | 0(0.0) | 0(0.0)  | 0(0.0) | 0(0.0)  | 0(0.0) | 12(0.5) |
| GEN-CHL-NAL-AMP-SAM-TET-CAZ-CTX-SXT     | 9(1.3) | 0(0.0) | 3(1.4) | 12(0.8) | 0(0.0) | 0(0.0)  | 0(0.0) | 0(0.0)  | 0(0.0) | 12(0.5) |
| CHL-TET-SXT                             | 5(0.7) | 0(0.0) | 5(2.4) | 10(0.6) | 0(0.0) | 1(0.2)  | 0(0.0) | 1(0.2)  | 0(0.0) | 11(0.5) |
| CHL-CIP-NAL-AMP-TET-SXT                 | 7(1.0) | 0(0.0) | 2(1.0) | 9(0.6)  | 1(1.9) | 0(0.0)  | 0(0.0) | 1(0.2)  | 0(0.0) | 10(0.4) |
| GEN-CHL-CIP-AMP-SAM-TET-SXT             | 0(0.0) | 0(0.0) | 0(0.0) | 0(0.0)  | 0(0.0) | 0(0.0)  | 9(7.4) | 9(1.4)  | 0(0.0) | 9(0.4)  |
| GEN-CHL-CIP-NAL-AMP-TET-CTX             | 3(0.4) | 4(0.6) | 2(1.0) | 9(0.6)  | 0(0.0) | 0(0.0)  | 0(0.0) | 0(0.0)  | 0(0.0) | 9(0.4)  |
| AMP-TET-SXT                             | 4(0.6) | 0(0.0) | 2(1.0) | 6(0.4)  | 1(1.9) | 0(0.0)  | 1(0.8) | 2(0.3)  | 0(0.0) | 8(0.4)  |
| CHL-CIP-AMP-TET-CAZ-CTX                 | 6(0.8) | 1(0.2) | 1(0.5) | 8(0.5)  | 0(0.0) | 0(0.0)  | 0(0.0) | 0(0.0)  | 0(0.0) | 8(0.4)  |
| CHL-NAL-AMP-SAM-TET-CAZ-CTX-SXT         | 5(0.7) | 2(0.3) | 0(0.0) | 7(0.4)  | 0(0.0) | 0(0.0)  | 0(0.0) | 0(0.0)  | 1(2.0) | 8(0.4)  |
| CIP-NAL-AMP-SAM-TET                     | 2(0.3) | 2(0.3) | 3(1.4) | 7(0.4)  | 0(0.0) | 1(0.2)  | 0(0.0) | 1(0.2)  | 0(0.0) | 8(0.4)  |
| NAL-AMP-TET-CAZ-CTX                     | 2(0.3) | 1(0.2) | 5(2.4) | 8(0.5)  | 0(0.0) | 0(0.0)  | 0(0.0) | 0(0.0)  | 0(0.0) | 8(0.4)  |
| NAL-AMP-TET-SXT                         | 3(0.4) | 0(0.0) | 2(1.0) | 5(0.3)  | 2(3.8) | 0(0.0)  | 1(0.8) | 3(0.5)  | 0(0.0) | 8(0.4)  |
| CHL-AMP-SAM-SXT                         | 6(0.8) | 0(0.0) | 1(0.5) | 7(0.4)  | 0(0.0) | 0(0.0)  | 0(0.0) | 0(0.0)  | 0(0.0) | 7(0.3)  |
| CHL-NAL-AMP-SAM-TET                     | 5(0.7) | 0(0.0) | 1(0.5) | 6(0.4)  | 0(0.0) | 0(0.0)  | 0(0.0) | 0(0.0)  | 1(2.0) | 7(0.3)  |
| CHL-TET                                 | 2(0.3) | 0(0.0) | 4(1.9) | 6(0.4)  | 0(0.0) | 0(0.0)  | 1(0.8) | 1(0.2)  | 0(0.0) | 7(0.3)  |
| CIP-NAL-AMP-SAM-TET-SXT                 | 0(0.0) | 0(0.0) | 0(0.0) | 0(0.0)  | 0(0.0) | 6(1.2)  | 1(0.8) | 7(1.1)  | 0(0.0) | 7(0.3)  |
| GEN-CHL-AMP-TET-SXT                     | 3(0.4) | 1(0.2) | 2(1.0) | 6(0.4)  | 0(0.0) | 0(0.0)  | 0(0.0) | 0(0.0)  | 1(2.0) | 7(0.3)  |
| GEN-CHL-CIP-AMP-TET                     | 0(0.0) | 1(0.2) | 6(2.9) | 7(0.4)  | 0(0.0) | 0(0.0)  | 0(0.0) | 0(0.0)  | 0(0.0) | 7(0.3)  |
| GEN-CHL-NAL-AMP-SAM-TET                 | 0(0.0) | 0(0.0) | 1(0.5) | 1(0.1)  | 0(0.0) | 6(1.2)  | 0(0.0) | 6(0.9)  | 0(0.0) | 7(0.3)  |
| NAL-AMP-CAZ-CTX                         | 1(0.1) | 1(0.2) | 5(2.4) | 7(0.4)  | 0(0.0) | 0(0.0)  | 0(0.0) | 0(0.0)  | 0(0.0) | 7(0.3)  |
| CHL                                     | 4(0.6) | 0(0.0) | 1(0.5) | 5(0.3)  | 0(0.0) | 0(0.0)  | 1(0.8) | 1(0.2)  | 0(0.0) | 6(0.3)  |





|                                 |        |        |        |        |        |        |        |        |        |        |
|---------------------------------|--------|--------|--------|--------|--------|--------|--------|--------|--------|--------|
| NAL-AMP-SAM-CTX-SXT             | 1(0.1) | 0(0.0) | 1(0.5) | 2(0.1) | 0(0.0) | 0(0.0) | 0(0.0) | 0(0.0) | 0(0.0) | 2(0.1) |
| NAL-AMP-SAM-TET-CAZ-CTX         | 0(0.0) | 0(0.0) | 1(0.5) | 1(0.1) | 0(0.0) | 1(0.2) | 0(0.0) | 1(0.2) | 0(0.0) | 2(0.1) |
| AMP-SAM-SXT                     | 0(0.0) | 0(0.0) | 0(0.0) | 0(0.0) | 0(0.0) | 0(0.0) | 0(0.0) | 0(0.0) | 1(2)   | 1(0)   |
| AMP-SAM-TET-CAZ-CTX-SXT         | 1(0.1) | 0(0.0) | 0(0.0) | 1(0.1) | 0(0.0) | 0(0.0) | 0(0.0) | 0(0.0) | 0(0.0) | 1(0)   |
| AMP-SAM-TET-CTX                 | 1(0.1) | 0(0.0) | 0(0.0) | 1(0.1) | 0(0.0) | 0(0.0) | 0(0.0) | 0(0.0) | 0(0.0) | 1(0)   |
| AMP-SXT                         | 0(0.0) | 1(0.2) | 0(0.0) | 1(0.1) | 0(0.0) | 0(0.0) | 0(0.0) | 0(0.0) | 0(0.0) | 1(0)   |
| AMP-TET-CAZ-CTX                 | 0(0.0) | 0(0.0) | 1(0.5) | 1(0.1) | 0(0.0) | 0(0.0) | 0(0.0) | 0(0.0) | 0(0.0) | 1(0)   |
| AMP-TET-CTX                     | 0(0.0) | 1(0.2) | 0(0.0) | 1(0.1) | 0(0.0) | 0(0.0) | 0(0.0) | 0(0.0) | 0(0.0) | 1(0)   |
| CHL-AMP                         | 1(0.1) | 0(0.0) | 0(0.0) | 1(0.1) | 0(0.0) | 0(0.0) | 0(0.0) | 0(0.0) | 0(0.0) | 1(0)   |
| CHL-AMP-CTX                     | 0(0.0) | 0(0.0) | 1(0.5) | 1(0.1) | 0(0.0) | 0(0.0) | 0(0.0) | 0(0.0) | 0(0.0) | 1(0)   |
| CHL-AMP-SAM-TET-CTX             | 1(0.1) | 0(0.0) | 0(0.0) | 1(0.1) | 0(0.0) | 0(0.0) | 0(0.0) | 0(0.0) | 0(0.0) | 1(0)   |
| CHL-AMP-SXT                     | 1(0.1) | 0(0.0) | 0(0.0) | 1(0.1) | 0(0.0) | 0(0.0) | 0(0.0) | 0(0.0) | 0(0.0) | 1(0)   |
| CHL-CIP-AMP-SAM-TET-CAZ-CTX     | 0(0.0) | 0(0.0) | 0(0.0) | 0(0.0) | 0(0.0) | 1(0.2) | 0(0.0) | 1(0.2) | 0(0.0) | 1(0)   |
| CHL-CIP-AMP-SAM-TET-CTX-SXT     | 0(0.0) | 0(0.0) | 0(0.0) | 0(0.0) | 0(0.0) | 1(0.2) | 0(0.0) | 1(0.2) | 0(0.0) | 1(0)   |
| CHL-CIP-NAL-AMP-SAM-CTX-SXT     | 0(0.0) | 0(0.0) | 0(0.0) | 0(0.0) | 0(0.0) | 0(0.0) | 1(0.8) | 1(0.2) | 0(0.0) | 1(0)   |
| CHL-CIP-NAL-AMP-SAM-TET-CTX-SXT | 0(0.0) | 0(0.0) | 0(0.0) | 0(0.0) | 0(0.0) | 0(0.0) | 0(0.0) | 0(0.0) | 1(2.0) | 1(0)   |
| CHL-CIP-NAL-AMP-TET-CAZ-CTX-SXT | 1(0.1) | 0(0.0) | 0(0.0) | 1(0.1) | 0(0.0) | 0(0.0) | 0(0.0) | 0(0.0) | 0(0.0) | 1(0)   |
| CHL-CIP-NAL-TET-SXT             | 0(0.0) | 0(0.0) | 0(0.0) | 0(0.0) | 0(0.0) | 0(0.0) | 1(0.8) | 1(0.2) | 0(0.0) | 1(0)   |
| CHL-CIP-TET                     | 0(0.0) | 0(0.0) | 1(0.5) | 1(0.1) | 0(0.0) | 0(0.0) | 0(0.0) | 0(0.0) | 0(0.0) | 1(0)   |
| CHL-NAL-AMP                     | 0(0.0) | 0(0.0) | 1(0.5) | 1(0.1) | 0(0.0) | 0(0.0) | 0(0.0) | 0(0.0) | 0(0.0) | 1(0)   |
| CHL-NAL-AMP-SAM-CAZ-CTX-SXT     | 1(0.1) | 0(0.0) | 0(0.0) | 1(0.1) | 0(0.0) | 0(0.0) | 0(0.0) | 0(0.0) | 0(0.0) | 1(0)   |
| CHL-NAL-AMP-SAM-TET-CTX         | 1(0.1) | 0(0.0) | 0(0.0) | 1(0.1) | 0(0.0) | 0(0.0) | 0(0.0) | 0(0.0) | 0(0.0) | 1(0)   |
| CHL-NAL-CAZ-CTX                 | 0(0.0) | 0(0.0) | 0(0.0) | 0(0.0) | 1(1.9) | 0(0.0) | 0(0.0) | 1(0.2) | 0(0.0) | 1(0)   |
| CHL-SAM-TET-CTX                 | 0(0.0) | 0(0.0) | 1(0.5) | 1(0.1) | 0(0.0) | 0(0.0) | 0(0.0) | 0(0.0) | 0(0.0) | 1(0)   |
| CIP-AMP-SAM-TET-CTX             | 0(0.0) | 0(0.0) | 0(0.0) | 0(0.0) | 1(1.9) | 0(0.0) | 0(0.0) | 1(0.2) | 0(0.0) | 1(0)   |
| CIP-AMP-TET-CAZ-CTX             | 1(0.1) | 0(0.0) | 0(0.0) | 1(0.1) | 0(0.0) | 0(0.0) | 0(0.0) | 0(0.0) | 0(0.0) | 1(0)   |
| CIP-NAL-AMP-TET-CAZ-CTX         | 0(0.0) | 0(0.0) | 1(0.5) | 1(0.1) | 0(0.0) | 0(0.0) | 0(0.0) | 0(0.0) | 0(0.0) | 1(0)   |
| CIP-NAL-TET-SXT                 | 0(0.0) | 0(0.0) | 0(0.0) | 0(0.0) | 1(1.9) | 0(0.0) | 0(0.0) | 1(0.2) | 0(0.0) | 1(0)   |
| GEN-AMP-SAM                     | 1(0.1) | 0(0.0) | 0(0.0) | 1(0.1) | 0(0.0) | 0(0.0) | 0(0.0) | 0(0.0) | 0(0.0) | 1(0)   |

|                                                 |           |         |           |           |          |         |        |          |         |           |
|-------------------------------------------------|-----------|---------|-----------|-----------|----------|---------|--------|----------|---------|-----------|
| GEN-AMP-SAM-TET-SXT                             | 1(0.1)    | 0(0.0)  | 0(0.0)    | 1(0.1)    | 0(0.0)   | 0(0.0)  | 0(0.0) | 0(0.0)   | 0(0.0)  | 1(0)      |
| GEN-CHL-CIP-NAL-AMP                             | 0(0.0)    | 0(0.0)  | 1(0.5)    | 1(0.1)    | 0(0.0)   | 0(0.0)  | 0(0.0) | 0(0.0)   | 0(0.0)  | 1(0)      |
| GEN-CHL-CIP-NAL-AMP-SAM-TET-CAZ-CTX             | 0(0.0)    | 0(0.0)  | 0(0.0)    | 0(0.0)    | 0(0.0)   | 1(0.2)  | 0(0.0) | 1(0.2)   | 0(0.0)  | 1(0)      |
| GEN-CHL-CIP-NAL-AMP-SAM-TET-CAZ-SXT             | 0(0.0)    | 0(0.0)  | 0(0.0)    | 0(0.0)    | 0(0.0)   | 1(0.2)  | 0(0.0) | 1(0.2)   | 0(0.0)  | 1(0)      |
| GEN-CHL-CIP-NAL-AMP-SAM-TET-IPN-CAZ-CTX-SXT-MEM | 0(0.0)    | 0(0.0)  | 0(0.0)    | 0(0.0)    | 0(0.0)   | 1(0.2)  | 0(0.0) | 1(0.2)   | 0(0.0)  | 1(0)      |
| GEN-CHL-CIP-NAL-AMP-TET-CAZ-CTX-SXT             | 1(0.1)    | 0(0.0)  | 0(0.0)    | 1(0.1)    | 0(0.0)   | 0(0.0)  | 0(0.0) | 0(0.0)   | 0(0.0)  | 1(0)      |
| GEN-CHL-NAL-AMP-SAM                             | 1(0.1)    | 0(0.0)  | 0(0.0)    | 1(0.1)    | 0(0.0)   | 0(0.0)  | 0(0.0) | 0(0.0)   | 0(0.0)  | 1(0)      |
| GEN-CHL-NAL-AMP-SAM-SXT                         | 1(0.1)    | 0(0.0)  | 0(0.0)    | 1(0.1)    | 0(0.0)   | 0(0.0)  | 0(0.0) | 0(0.0)   | 0(0.0)  | 1(0)      |
| GEN-CHL-NAL-TET-SXT                             | 1(0.1)    | 0(0.0)  | 0(0.0)    | 1(0.1)    | 0(0.0)   | 0(0.0)  | 0(0.0) | 0(0.0)   | 0(0.0)  | 1(0)      |
| GEN-CHL-SXT                                     | 1(0.1)    | 0(0.0)  | 0(0.0)    | 1(0.1)    | 0(0.0)   | 0(0.0)  | 0(0.0) | 0(0.0)   | 0(0.0)  | 1(0)      |
| GEN-CIP                                         | 0(0.0)    | 0(0.0)  | 1(0.5)    | 1(0.1)    | 0(0.0)   | 0(0.0)  | 0(0.0) | 0(0.0)   | 0(0.0)  | 1(0)      |
| GEN-NAL-AMP-SAM-TET                             | 1(0.1)    | 0(0.0)  | 0(0.0)    | 1(0.1)    | 0(0.0)   | 0(0.0)  | 0(0.0) | 0(0.0)   | 0(0.0)  | 1(0)      |
| GEN-NAL-AMP-SAM-TET-SXT                         | 1(0.1)    | 0(0.0)  | 0(0.0)    | 1(0.1)    | 0(0.0)   | 0(0.0)  | 0(0.0) | 0(0.0)   | 0(0.0)  | 1(0)      |
| GEN-NAL-AMP-TET-SXT                             | 0(0.0)    | 0(0.0)  | 1(0.5)    | 1(0.1)    | 0(0.0)   | 0(0.0)  | 0(0.0) | 0(0.0)   | 0(0.0)  | 1(0)      |
| NAL-AMP-CAZ-SXT                                 | 0(0.0)    | 0(0.0)  | 1(0.5)    | 1(0.1)    | 0(0.0)   | 0(0.0)  | 0(0.0) | 0(0.0)   | 0(0.0)  | 1(0)      |
| NAL-AMP-SAM-SXT                                 | 1(0.1)    | 0(0.0)  | 0(0.0)    | 1(0.1)    | 0(0.0)   | 0(0.0)  | 0(0.0) | 0(0.0)   | 0(0.0)  | 1(0)      |
| NAL-CAZ-CTX-SXT                                 | 0(0.0)    | 1(0.2)  | 0(0.0)    | 1(0.1)    | 0(0.0)   | 0(0.0)  | 0(0.0) | 0(0.0)   | 0(0.0)  | 1(0)      |
| NAL-SXT                                         | 0(0.0)    | 1(0.2)  | 0(0.0)    | 1(0.1)    | 0(0.0)   | 0(0.0)  | 0(0.0) | 0(0.0)   | 0(0.0)  | 1(0)      |
| SAM-TET-SXT                                     | 0(0.0)    | 0(0.0)  | 1(0.5)    | 1(0.1)    | 0(0.0)   | 0(0.0)  | 0(0.0) | 0(0.0)   | 0(0.0)  | 1(0)      |
| SXT                                             | 1(0.1)    | 0(0.0)  | 0(0.0)    | 1(0.1)    | 0(0.0)   | 0(0.0)  | 0(0.0) | 0(0.0)   | 0(0.0)  | 1(0)      |
| Pan susceptible                                 | 100(13.9) | 34(5.3) | 121(57.9) | 255(16.2) | 18(34.6) | 43(8.8) | 8(6.6) | 69(10.5) | 7(13.7) | 331(14.5) |

Patient age distribution is indicated ( $\leq 5$ , 5-59, and  $\geq 60$  years old).

**Table S3 The antimicrobial susceptibility phenotypes of isolates among different *Salmonella* serovars.**

| <i>Serovars</i>        | Pan susceptible | Resistant to<br>≥ 1 class of antimicrobials | Resistant to<br>≥ 3 classes of antimicrobials | Resistant to<br>IPN and MEM |
|------------------------|-----------------|---------------------------------------------|-----------------------------------------------|-----------------------------|
| Indiana(n=95)          | 2(2.1)          | 93(97.9)                                    | 90(94.7)                                      | 1(1.1)                      |
| Corvallis(n=24)        | 2(8.3)          | 22(91.7)                                    | 19(79.2)                                      | 0                           |
| Derby(n=129)           | 8(6.2)          | 121(93.8)                                   | 85(65.9)                                      | 0                           |
| Thompson(n=70)         | 15(21.4)        | 55(78.6)                                    | 46(65.7)                                      | 0                           |
| London(n=97)           | 25(25.8)        | 72(74.2)                                    | 63(64.9)                                      | 0                           |
| Typhimurium(n=664)     | 53(8.0)         | 611(92.0)                                   | 417(62.8)                                     | 0                           |
| Rissen(n=46)           | 3(6.5)          | 43(93.5)                                    | 28(60.9)                                      | 0                           |
| Enteritidis(n=672)     | 16(2.4)         | 656(97.6)                                   | 362(53.9)                                     | 2(0.3)                      |
| Litchfield(n=20)       | 4(20.0)         | 16(80.0)                                    | 10(50.0)                                      | 0                           |
| Gold-coast(n=15)       | 7(46.7)         | 8(53.3)                                     | 7(46.7)                                       | 0                           |
| Agona(n=74)            | 32(43.2)        | 42(56.8)                                    | 34(45.9)                                      | 0                           |
| Virchow(n=11)          | 4(36.4)         | 7(63.6)                                     | 5(45.5)                                       | 0                           |
| Saintpaul(n=18)        | 10(55.6)        | 8(44.4)                                     | 8(44.4)                                       | 0                           |
| Infantis(n=55)         | 15(27.3)        | 40(72.7)                                    | 23(41.8)                                      | 0                           |
| Give(n=26)             | 8(30.8)         | 18(69.2)                                    | 9(34.6)                                       | 0                           |
| Meleagridis(n=11)      | 2(18.2)         | 9(81.8)                                     | 3(27.3)                                       | 0                           |
| Stanley(n=36)          | 23(63.9)        | 13(36.1)                                    | 7(19.4)                                       | 0                           |
| Senftenberg(n=21)      | 15(71.4)        | 6(28.6)                                     | 4(19.0)                                       | 0                           |
| Paratyphi B(n=16)      | 11(68.8)        | 5(31.3)                                     | 3(18.8)                                       | 0                           |
| Aberdeen(n=14)         | 11(78.6)        | 3(21.4)                                     | 2(14.3)                                       | 0                           |
| Albany(n=10)           | 0               | 10                                          | 10                                            | 0                           |
| Bovismorbificans(n=10) | 5               | 5                                           | 3                                             | 0                           |
| Javiana(n=10)          | 8               | 2                                           | 2                                             | 0                           |
| Mbandaka(n=10)         | 6               | 4                                           | 2                                             | 0                           |
| Agona (n=1)            | 0               | 1                                           | 0                                             | 0                           |
| Altona(n=2)            | 0               | 2                                           | 1                                             | 0                           |
| Amoutive(n=1)          | 1               | 0                                           | 0                                             | 0                           |
| Anatum(n=3)            | 0               | 3                                           | 1                                             | 0                           |
| Bareilly(n=6)          | 0               | 6                                           | 4                                             | 0                           |
| Braenderup(n=7)        | 0               | 7                                           | 0                                             | 0                           |
| Brandenburg(n=1)       | 1               | 0                                           | 0                                             | 0                           |
| Brunei(n=1)            | 0               | 1                                           | 0                                             | 0                           |
| Carrau(n=1)            | 0               | 1                                           | 0                                             | 0                           |
| Cerro(n=1)             | 1               | 0                                           | 0                                             | 0                           |
| Chailey(n=4)           | 4               | 0                                           | 0                                             | 0                           |
| Hadar(n=4)             | 0               | 4                                           | 1                                             | 0                           |
| Havana(n=7)            | 0               | 7                                           | 7                                             | 0                           |
| Houston(n=1)           | 1               | 0                                           | 0                                             | 0                           |
| Hvittingfoss(n=3)      | 1               | 2                                           | 2                                             | 0                           |
| Isangi(n=2)            | 0               | 2                                           | 2                                             | 0                           |
| Johannesburg(n=2)      | 0               | 2                                           | 1                                             | 0                           |
| Kentucky(n=1)          | 0               | 1                                           | 1                                             | 0                           |
| Kottbus(n=1)           | 0               | 1                                           | 0                                             | 0                           |
| Lexington(n=2)         | 2               | 0                                           | 0                                             | 0                           |
| Liverpool(n=1)         | 0               | 1                                           | 1                                             | 0                           |

|                   |           |             |             |        |
|-------------------|-----------|-------------|-------------|--------|
| Livingston(n=7)   | 1         | 6           | 4           | 0      |
| Manhattan(n=1)    | 1         | 0           | 0           | 0      |
| Montevideo(n=4)   | 1         | 3           | 2           | 0      |
| Muenchen(n=6)     | 5         | 1           | 1           | 0      |
| Muenster(n=8)     | 4         | 4           | 2           | 0      |
| Newport(n=8)      | 3         | 5           | 2           | 0      |
| Oranieburg(n=1)   | 1         | 0           | 0           | 0      |
| Orion(n=2)        | 0         | 2           | 1           | 0      |
| Panama(n=1)       | 1         | 0           | 0           | 0      |
| Paratyphi A(n=1)  | 0         | 1           | 1           | 0      |
| Pomona(n=1)       | 0         | 1           | 1           | 0      |
| Poona(n=2)        | 1         | 1           | 1           | 0      |
| Reading(n=1)      | 0         | 1           | 1           | 0      |
| Sandiego(n=2)     | 1         | 1           | 1           | 0      |
| Schleissheim(n=8) | 4         | 4           | 4           | 0      |
| Singapore(n=3)    | 1         | 2           | 0           | 0      |
| Tennessee(n=5)    | 3         | 2           | 2           | 0      |
| Uganda(n=4)       | 2         | 2           | 0           | 0      |
| Wandsworth(n=7)   | 5         | 2           | 0           | 0      |
| Weltevreden(n=2)  | 0         | 2           | 0           | 0      |
| Worthington(n=2)  | 1         | 1           | 1           | 0      |
| Overall(n=2,283)  | 331(14.5) | 1,952(85.5) | 1,288(56.4) | 3(0.1) |

---

**Table S4 Distribution of *bla*<sub>CTX-M</sub> genes, *gyrA/parC* mutations and PMQRs in ESBLs-producing *Salmonella* spp. isolates recovered from patients with diarrhea, food of animal origin, and pets in China (n = 222).**

| Source                          | Patients with diarrhea |      |     | Food of animal origin |      | Pets   |       |       | Serovars  |      |       |           |         |           |         |          |             |
|---------------------------------|------------------------|------|-----|-----------------------|------|--------|-------|-------|-----------|------|-------|-----------|---------|-----------|---------|----------|-------------|
|                                 | ≤5                     | 5-59 | ≥60 | Chicken meat          | Pork | Turtle | Agona | Derby | Enteritis | Give | Havan | Hvittingf | Indiana | Saintpaul | Stanley | Thompson | Typhimurium |
| <i>bla</i> <sub>CTX-M</sub>     |                        |      |     |                       |      |        |       |       |           |      |       |           |         |           |         |          |             |
| <i>bla</i> <sub>CTX-M-14</sub>  | 21                     | 10   | 6   | 7                     | 1    | 1      | 0     | 1     | 23        | 0    | 0     | 0         | 7       | 1         | 0       | 4        | 10          |
| <i>bla</i> <sub>CTX-M-24</sub>  | 1                      | 0    | 0   | 5                     | 0    | 0      | 0     | 0     | 1         | 0    | 0     | 0         | 5       | 0         | 0       | 0        | 0           |
| <i>bla</i> <sub>CTX-M-27</sub>  | 0                      | 0    | 0   | 1                     | 0    | 0      | 0     | 0     | 0         | 0    | 0     | 0         | 1       | 0         | 0       | 0        | 0           |
| <i>bla</i> <sub>CTX-M-65</sub>  | 4                      | 19   | 7   | 55                    | 0    | 1      | 1     | 1     | 10        | 8    | 0     | 0         | 53      | 0         | 0       | 1        | 12          |
| <i>bla</i> <sub>CTX-M-79</sub>  | 23                     | 4    | 7   | 8                     | 1    | 1      | 0     | 0     | 25        | 0    | 0     | 0         | 8       | 0         | 0       | 1        | 10          |
| <i>bla</i> <sub>CTX-M-90</sub>  | 0                      | 0    | 0   | 1                     | 0    | 0      | 0     | 0     | 0         | 0    | 0     | 0         | 1       | 0         | 0       | 0        | 0           |
| <i>bla</i> <sub>CTX-M-123</sub> | 1                      | 0    | 0   | 61                    | 0    | 0      | 0     | 0     | 1         | 0    | 0     | 0         | 61      | 0         | 0       | 0        | 0           |
| <i>bla</i> <sub>CTX-M-130</sub> | 15                     | 6    | 4   | 11                    | 1    | 0      | 0     | 3     | 7         | 0    | 0     | 0         | 10      | 2         | 1       | 1        | 13          |
| <i>gyrA</i> mutation            |                        |      |     |                       |      |        |       |       |           |      |       |           |         |           |         |          |             |
| S83Y                            | 3                      | 2    | 12  | 1                     | 0    | 5      | 0     | 1     | 5         | 8    | 0     | 0         | 0       | 0         | 0       | 5        | 4           |
| S83F                            | 4                      | 0    | 0   | 90                    | 1    | 0      | 0     | 0     | 2         | 0    | 0     | 0         | 89      | 0         | 0       | 0        | 4           |
| D87G                            | 3                      | 2    | 1   | 2                     | 1    | 0      | 0     | 0     | 7         | 0    | 0     | 0         | 2       | 0         | 0       | 0        | 0           |
| D87N                            | 1                      | 0    | 0   | 92                    | 1    | 0      | 0     | 1     | 3         | 0    | 0     | 0         | 88      | 0         | 0       | 0        | 2           |
| D87Y                            | 4                      | 0    | 3   | 1                     | 0    | 0      | 0     | 0     | 7         | 0    | 0     | 0         | 0       | 0         | 0       | 0        | 1           |
| <i>parC</i> mutation            |                        |      |     |                       |      |        |       |       |           |      |       |           |         |           |         |          |             |
| S80R                            | 0                      | 0    | 0   | 89                    | 1    | 0      | 0     | 0     | 1         | 0    | 0     | 0         | 89      | 0         | 0       | 0        | 0           |
| PMRQ                            |                        |      |     |                       |      |        |       |       |           |      |       |           |         |           |         |          |             |
| <i>qnrB</i>                     | 21                     | 9    | 22  | 49                    | 1    | 14     | 1     | 3     | 16        | 7    | 0     | 1         | 48      | 2         | 1       | 17       | 20          |
| <i>qnrS</i>                     | 46                     | 18   | 38  | 97                    | 3    | 20     | 1     | 6     | 49        | 8    | 1     | 1         | 92      | 3         | 1       | 21       | 39          |
| <i>qepA</i>                     | 0                      | 0    | 0   | 29                    | 3    | 20     | 0     | 3     | 3         | 0    | 1     | 1         | 26      | 0         | 0       | 17       | 1           |
| <i>aac(6')-Ib</i>               | 46                     | 18   | 38  | 97                    | 3    | 20     | 1     | 6     | 49        | 8    | 1     | 1         | 92      | 3         | 1       | 21       | 39          |
| <i>oqxA</i>                     | 45                     | 17   | 36  | 97                    | 3    | 20     | 1     | 6     | 45        | 8    | 1     | 1         | 92      | 3         | 1       | 21       | 39          |
| <i>oqxB</i>                     | 45                     | 17   | 36  | 97                    | 3    | 20     | 1     | 6     | 45        | 8    | 1     | 1         | 92      | 3         | 1       | 21       | 39          |

Patient age distribution is indicated (≤5, 5-59, and ≥60 years old).
